# Supplementary material for: The Prognostic Value of PERK in Cancer and Its Relationship With Immune Cell Infiltration
Source: Front Mol Biosci. 2021 Apr 16;8:648752. doi: 10.3389/fmolb.2021.648752 (PMC8085429; doi:10.3389/fmolb.2021.648752)
Supplement: Supplementary file 8 [file Table_8.XLSX]

## Sheet: Low
NAME	GS<br> follow link to MSigDB	GS DETAILS	SIZE	ES	NES	NOM p-val	FDR q-val	FWER p-val	RANK AT MAX	LEADING EDGE
KEGG_RIBOSOME	KEGG_RIBOSOME	Details ...	88	-0.571911	-1.26526	0.282101	0.477502	0.885	5587	tags=53%, list=10%, signal=59%
KEGG_AUTOIMMUNE_THYROID_DISEASE	KEGG_AUTOIMMUNE_THYROID_DISEASE	Details ...	50	-0.203836	-0.570671	0.869396	1	1	4299	tags=28%, list=7%, signal=30%
KEGG_OLFACTORY_TRANSDUCTION	KEGG_OLFACTORY_TRANSDUCTION	Details ...	387	-0.0879333	-0.333146	1	0.997683	1	5581	tags=20%, list=10%, signal=22%
